# Supplementary material
Source: Copernicus journal article supplement (doi:10.5194/essd-2026-318)
Supplement: Supplementary file 1 [file essd-2026-318-supplement.pdf]

*Supplement of*

**Reconstruction of Global 0.25° Land  
Lightning Density from 1979 to 2025 based  
on an ensemble machine learning**

**Hao Zheng et al.**

*Correspondence to:* Jun Wang (wangjun@nju.edu.cn)

The copyright of individual parts of the supplement might differ from the article licence.

**Table S1.** Description of input variables.

| <b>Feature name</b> | <b>Description</b>                                                          | <b>Unit</b>                               |
|---------------------|-----------------------------------------------------------------------------|-------------------------------------------|
| cape                | CAPE                                                                        | $\text{J kg}^{-1}$                        |
| cape_tp             | CAPE * total precipitation                                                  | /                                         |
| kx                  | K-index                                                                     | K                                         |
| tp                  | total precipitation                                                         | m                                         |
| cp                  | Convective precipitation                                                    | m                                         |
| lsp                 | Large scale precipitation                                                   | m                                         |
| lcc                 | Low cloud cover                                                             | /                                         |
| mcc                 | Middle cloud cover                                                          | /                                         |
| hcc                 | High cloud cover                                                            | /                                         |
| t2m                 | 2m temperature                                                              | K                                         |
| msl                 | mean sea level pressure                                                     | Pa                                        |
| u100                | 100 metre U wind component                                                  | $\text{m s}^{-1}$                         |
| v100                | 100 metre V wind component                                                  | $\text{m s}^{-1}$                         |
| tciw                | Total column cloud ice water                                                | $\text{kg m}^{-2}$                        |
| tcilw               | Total column cloud liquid water                                             | $\text{kg m}^{-2}$                        |
| viiwd               | Total column vertically-integrated<br>divergence of cloud frozen water flux | $\text{kg m}^{-2} \text{ s}^{-1}$         |
| vilwd               | Total column vertically-integrated<br>divergence of cloud liquid water flux | $\text{kg m}^{-2} \text{ s}^{-1}$         |
| viiwe               | Total column vertically-integrated eastward<br>cloud frozen water flux      | $\text{kg m}^{-1} \text{ s}^{-1}$         |
| vilwe               | Total column vertically-integrated eastward<br>cloud liquid water flux      | $\text{kg m}^{-1} \text{ s}^{-1}$         |
| viiwn               | Total column vertically-integrated<br>northward cloud frozen water flux     | $\text{kg m}^{-1} \text{ s}^{-1}$         |
| vilwn               | Total column vertically-integrated<br>northward cloud liquid water flux     | $\text{kg m}^{-1} \text{ s}^{-1}$         |
| totalx              | Total totals index                                                          | K                                         |
| lai_lv              | Leaf area index, low vegetation                                             | /                                         |
| lai_hv              | Leaf area index, high vegetation                                            | /                                         |
| q850                | Specific humidity (850 hPa)                                                 | $\text{kg kg}^{-1}$                       |
| w                   | Vertical velocity (500 hPa)                                                 | $\text{Pa s}^{-1}$                        |
| mrh600_800          | Mean relative humidity between 600 and<br>800 hPa                           | %                                         |
| abs_lat             | Absolute latitude                                                           | /                                         |
| month_sin           | $\sin(2\pi m/12)$ , m being the month of the year                           | /                                         |
| month_cos           | $\cos(2\pi m/12)$ , m being the month of the year                           | /                                         |
| lightning_density   | Lightning stroke density                                                    | $\text{strokes km}^{-2} \text{ day}^{-1}$ |

**Table S2.** Five-fold cross-validation evaluation metrics for the four base models (XGBoost, RF, LightGBM, and DNN) during 2013–2024. Values are reported as the mean and standard deviation across the five validation folds.

| Model    | R <sup>2</sup> |        | RMSE   |        | MAE    |        |
|----------|----------------|--------|--------|--------|--------|--------|
|          | mean           | std    | mean   | std    | mean   | std    |
| XGBoost  | 0.6498         | 0.0010 | 0.0114 | 0.0000 | 0.0034 | 0.0000 |
| RF       | 0.6519         | 0.0018 | 0.0114 | 0.0000 | 0.0030 | 0.0000 |
| LightGBM | 0.6872         | 0.0009 | 0.0108 | 0.0000 | 0.0032 | 0.0000 |
| DNN      | 0.6344         | 0.0022 | 0.0117 | 0.0000 | 0.0036 | 0.0000 |

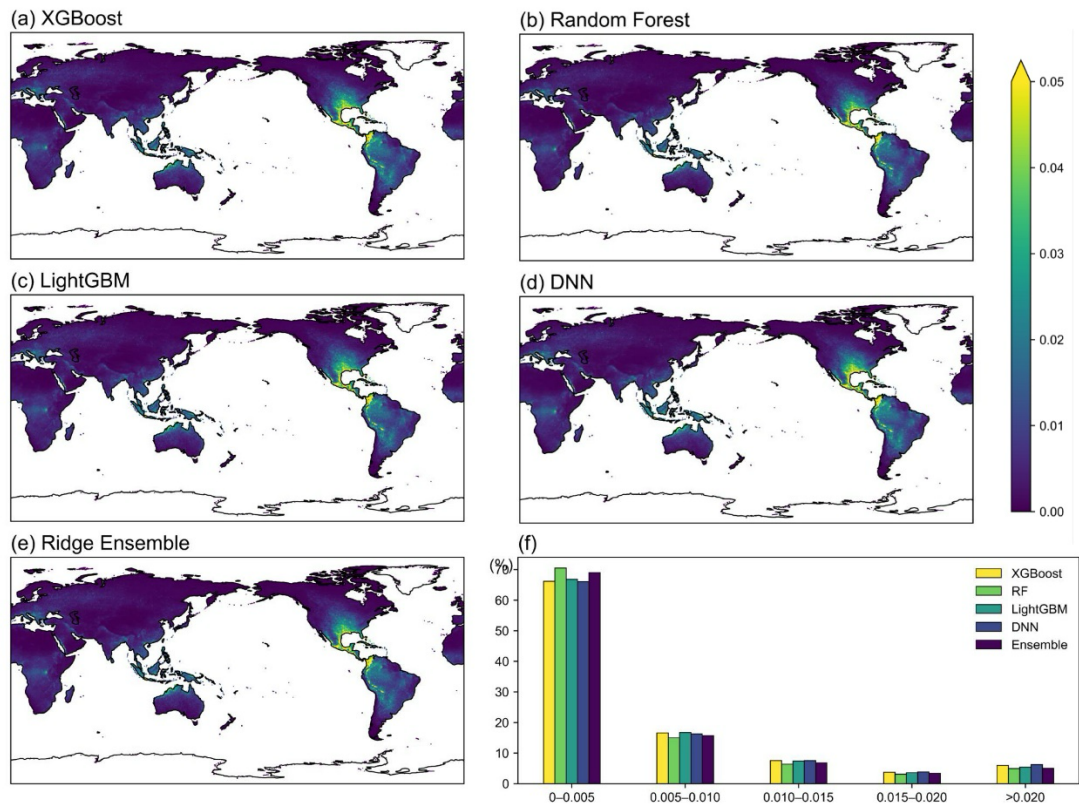

**Figure S1.** Spatial distribution of the RMSE for four base models **(a)** XGBoost, **(b)** RF, **(c)** LightGBM, **(d)** DNN and **(e)** ridge regression ensemble. The bar chart **(f)** shows the percentage of global grid cells falling within different RMSE intervals for each model.

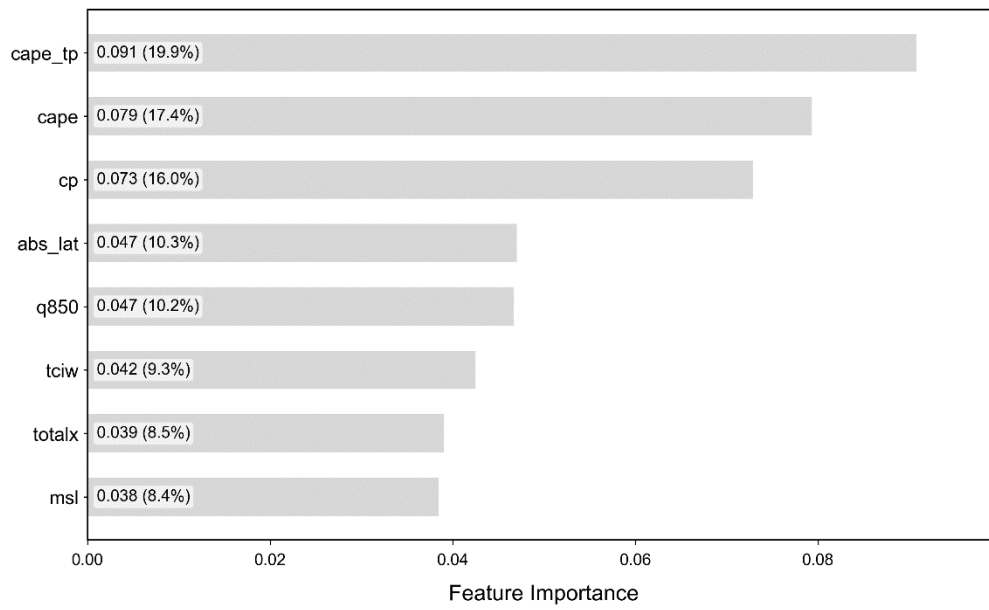

**Figure S2.** RF feature importance ranking for lightning-density prediction.

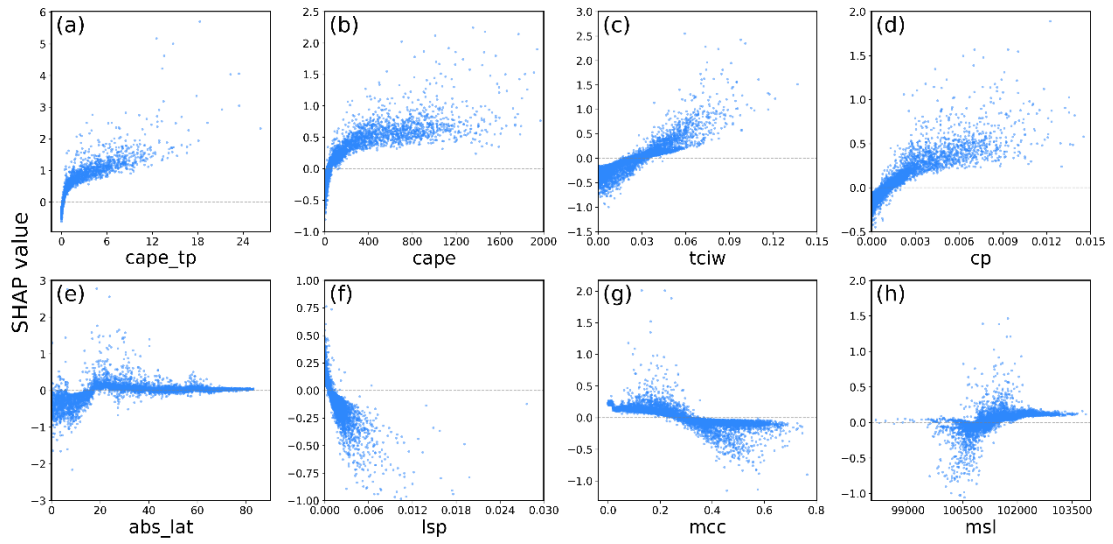

**Figure S3.** SHAP dependence plots for the top eight influencing factors identified by the LightGBM model.
